# Supplementary material
Source: publisher figshare collection journal article supplement (https://tandf.figshare.com/ndownloader/files/22278330)
Supplement: Supplementary file 1 [file 22278330]

**Supplementary Material**

Full list of factors and indicators including individual responses (for the purposes of maintaining confidentiality, the designations of the District Councils have been removed)

| **Factor** | **No** | **Indicator Related to the Factor** | **Evaluation Criteria** |  | **Assessment** |  |
| --- | --- | --- | --- | --- | --- | --- |
|  |  |  |  | **Pos** | **Mod** | **Neg** |
| **Environmental** | | | | | | |
| Acknowledgement of climate change | 1 | Importance of natural environment | 5-4/3/2-1 | 6 | 0 | 0 |
| 2 | Acknowledgement of climate change as a risk | 5-4/3/2-1 | 6 | 0 | 0 |
| 3 | Acknowledgement of present climate change impacts | Y/N | 6 |  | 0 |
| Environmental management strategies | 4 | Effectiveness of environmental legislation | Effective/  moderate/ ineffective | 0 | 0 | 6 |
| 5 | Effectiveness of Environmental Impact Assessments | Effective/  moderate/ ineffective | 2 | 1 | 3 |
| Ecosystem protection and information | 6 | Importance of ecosystem protection | High/  moderate/low | 6 | 0 | 0 |
| 7 | Level of ecosystem protection | Effective/ ineffective | 5 |  | 1 |
| **Social** | | | | | | |
| Internal collaboration | 8 | Cooperation within District Councils | 5-4/3/2-1 | 1 | 4 | 1 |
| Internal collaboration  External collaboration | 9 | Cooperation between District Councils | Yes/No | 4 |  | 2 |
| 10 | Climate change projects initiated by other District Councils | Yes/No | 2 |  | 4 |
| External collaboration  Mandated cooperation | 11 | Climate change projects initiated by District Council with participation of others | Yes/No | 1 |  | 5 |
| 12 | Participation of District Council in ICZM meetings | Yes/No | 5 |  | 1 |
| Mandated cooperation  Stakeholder participation | 13 | Regularity of participation in ICZM meeting | Monthly/  Yearly/None | 4 | 0 | 1 |
| 14 | Significance of ICZM for daily work | 5-4/3/2-1 | 2 | 1 | 3 |
| 15 | Stakeholder involvement | Effective/  moderate/ ineffective | 4 | 1 | 1 |
| Stakeholder participation  Knowledge and information sharing | 16 | Possibility of attending participatory forums | Yes/No | 2 |  | 4 |
| 17 | Information and exchange for coastal management | Yes/No | 1 |  | 5 |
| Knowledge and information sharing | 18 | Information and exchange for climate change | Yes/No | 3 |  | 3 |
| 19 | Accessibility of information provided by National Government | 5-4/3/2-1 | 0 | 3 | 3 |
| 20 | Usability of information provided by National Government | 5-4/3/2-1 | 0 | 1 | 5 |
| **Financial** | | | | | | |
| Funds for adaptation | 21 | Existence of adaptation projects at District Council level | Y/N | 3 |  | 3 |
| 22 | Initiation of adaptation projects | District Council/  National | 2 |  | 4 |
| 23 | Allocation of funds for adaptation | Y/N | 2 |  | 4 |
| 24 | Evaluation of expenditure on projects dealing with adaptation | 5-4/3/2-1 | 0 | 1 | 5 |
| Funds for disaster preparedness | 25 | Existence of disaster preparedness projects at District Council level | Y/N | 6 |  | 0 |
| 26 | Initiation of disaster preparedness projects | District Council/  National | 4 |  | 2 |
| 27 | Allocation of funds for disaster preparedness | Y/N | 3 |  | 3 |
| 28 | Evaluation of expenditure on projects dealing with disaster preparedness | 5-4/3/2-1 | 0 | 3 | 3 |
| Buffers against climate risk | 29 | Compensation mechanisms for climate risk | Y/N | 2 |  | 4 |
| 30 | Amount of businesses insured against climate risk | >50%/25-50%/<25% | 0 | 0 | 6 |
| Ability to mobilise external funding | 31 | Funding opportunities for adaptation | Y/N | 4 |  | 2 |
| 32 | Preparation of proposals for adaptation funding | Y/N | 4 |  | 2 |
| **Political** | | | | | | |
| Regulatory framework | 33 | Relevance of ICZM for daily work | 5-4/3/2-1 | 2 | 1 | 3 |
| 34 | Relevance of adaptation toolkits for daily work | 5-4/3/2-1 | 3 |  | 3 |
| 35 | Significance of challenges when implementing environmental regulation | Insignificant/  significant/  highly significant | 1 | 1 | 4 |
| 36 | Adaptation plan at District Council | Y/N | 0 |  | 6 |
| Institutional organization and political support | 37 | Adaptation coordination within District Council | Y/N | 0 |  | 6 |
| 38 | ICZM coordination within District Council | Y/N | 0 |  | 6 |
| 39 | Clarity of roles and responsibility concerning adaptation | 5-4/3/2-1 | 0 | 0 | 6 |
| 40 | Level of National Government support for adaptation | 5-4/3/2-1 | 0 | 4 | 2 |
| 41 | Level of political support for adaptation | 5-4/3/2-1 |  | 1 | 5 |
| 42 | Degree of control over budget at District Council level | High/  moderate/low | 3 | 2 | 1 |
| Transparency | 43 | Public involvement in decision-making at District Councils | Y/N | 4 |  | 2 |
| 44 | Platforms for public to raise issues and voice concerns | Y/N | 6 |  | 0 |
| 45 | Level of access for public over budget | 5-4/3/2-1 | 6 | 0 | 0 |
| 46 | Involvement of public in budgeting | 5-4/3/2-1 | 0 | 0 | 6 |
| **Human** | | | | | | |
| Human resources | 47 | Access to technical reports to assist with adaptation | Y/N | 1 |  | 5 |
| 48 | Availability of coastal engineers | Y/N | 0 | 0 | 6 |
| 49 | Participation in capacity-building exercises | Y/N | 2 |  | 4 |
| 50 | Impact of staff turnover | High/  moderate/low | 1 | 0 | 5 |
| Leadership on climate change | 51 | Presence of climate change leaders or officers at District Council level | Y/N | 0 | 0 | 6 |
| 52 | Formally designated roles for climate change at District Council level | Y/N | 0 | 0 | 6 |
| Knowledge and skills | 53 | Availability of local vulnerability assessment | Y/N | 2 |  | 4 |
|  | 54 | Climate information integrated into planning processes | Y/N | 2 |  | 4 |
